# Supplementary material for: A single cyclin–CDK complex is sufficient for both mitotic and meiotic progression in fission yeast
Source: PubMed Central journal article supplement (PMC4411289; doi:10.1038/ncomms7871), 2015-04-20
Supplement: ncomms7871-s1.pdf [file ncomms7871-s1.pdf]

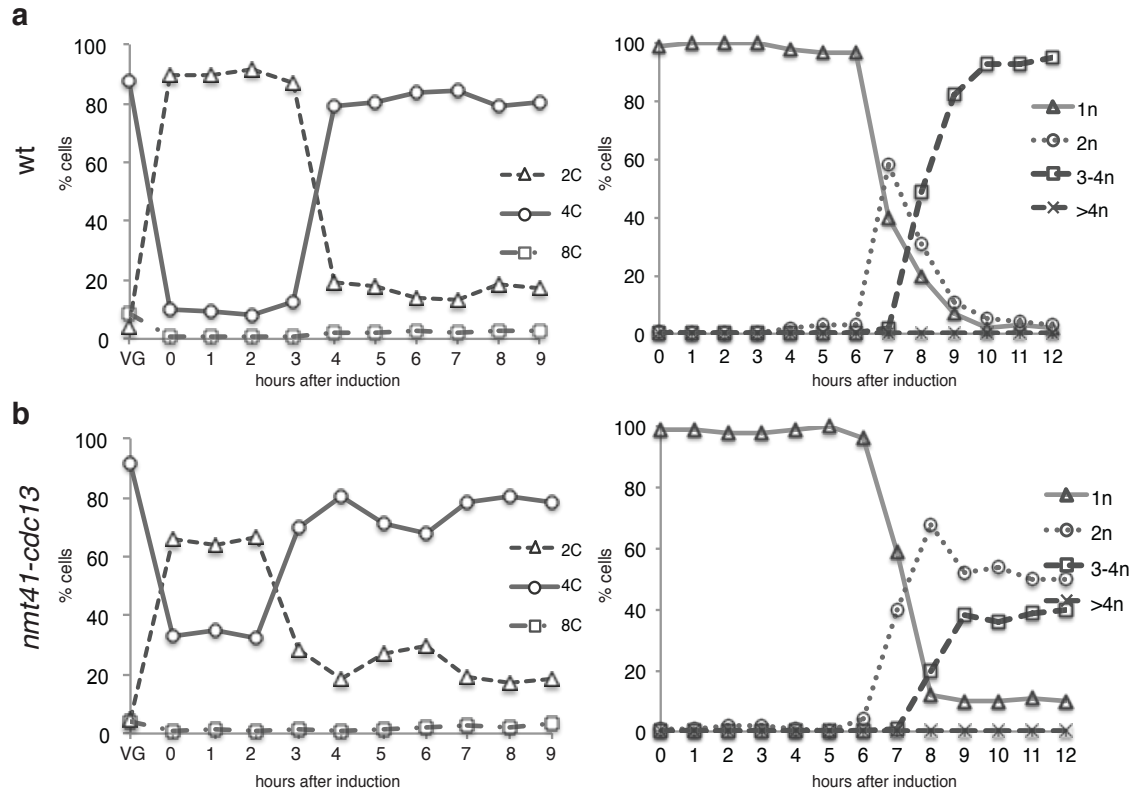

**Supplementary Figure 1. Synchronous azygotic meiosis in non-repressive conditions in an *nmt41-cdc13* strain.** Synchronous meiosis was chemically induced in **(a)**  $h^+/h^+$  *pat1as2* (wt) and **(b)**  $h^+/h^+$   $\Delta cdc13$  *nmt41-cdc13* *pat1as2* (*nmt41-cdc13*) homozygous diploid strains. Pat1 inactivation was achieved by adding 30 $\mu$ M of Nm-PP1 at 28°C to the culture after 17 hours of nitrogen starvation (time 0). No thiamine was added to the media to allow *cdc13* expression under *nmt41* promoter. DNA content (left panel) and the number of nuclei (right panel) were followed every hour.

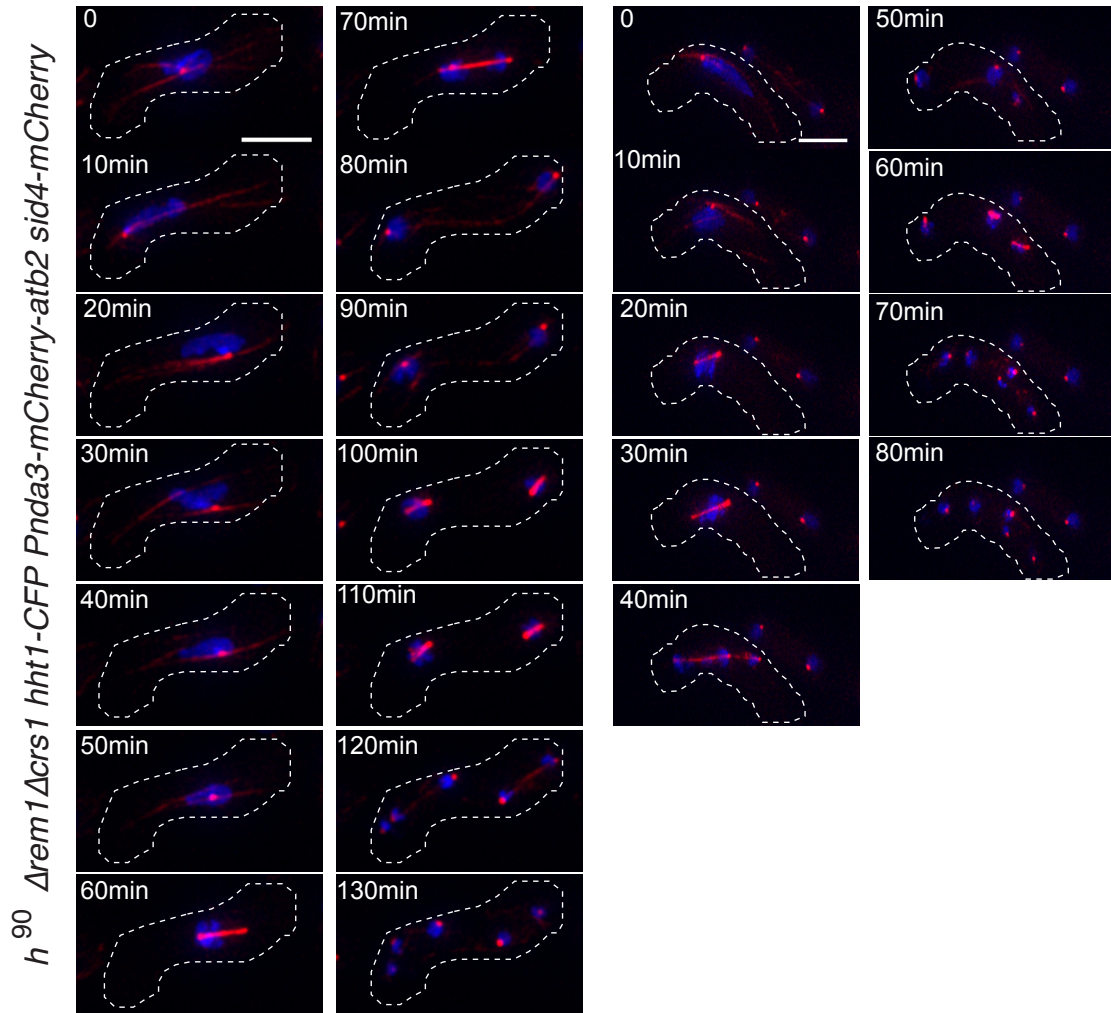

**Supplementary Figure 2. *Δrem1Δcrs1* mutants show multipolar divisions during zygotic meiosis.** Time-lapse of *h<sup>90</sup> hhtc1-CFP atb1-mCherry sid4-mCherry rem1Δcrs1Δ* strain (Pi275) after meiotic induction. Images show a representative example of multipolar division during meiosis II (left panels) and meiosis I (right panels). These aberrant divisions were more frequent during meiosis II (45.4%) than during meiosis I (36.4%), while 18.2% of these zygotes showed defects in both meiosis I and II. Scale bars, 5μm.

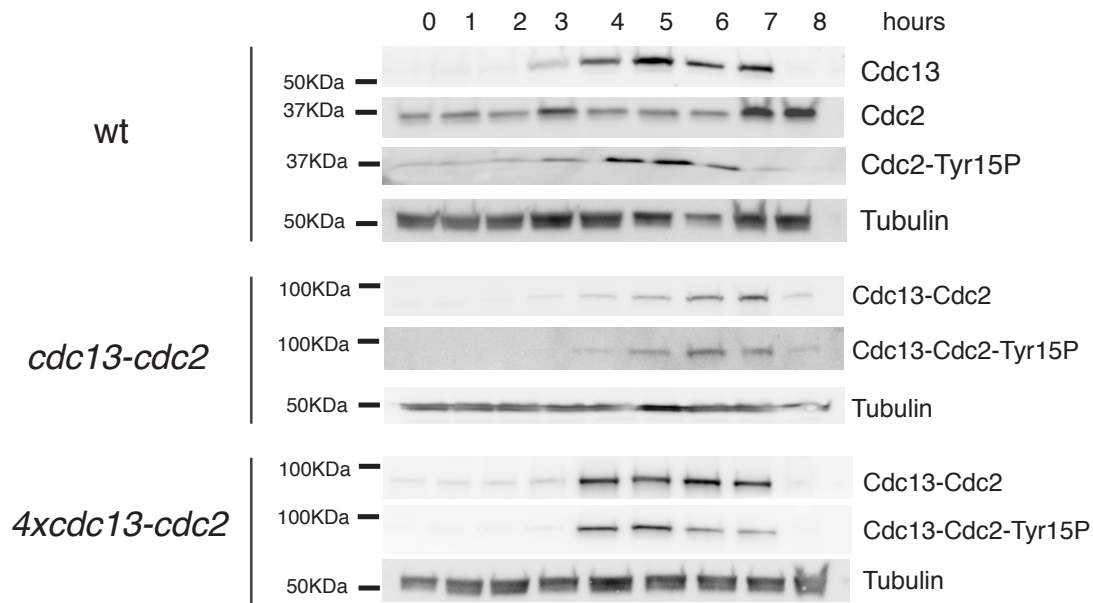

**Supplementary Figure 3. Cdc13-Cdc2 fusion protein dynamics during synchronous meiosis.** Cells from the experiment described in Figure 7a and 7b were collected every hour to follow protein dynamics. A diploidized wild type strain was used as a control (Pi263). Protein samples were analysed by Western blot using anti-Cdc13 (SP4), Cdc2 (PSTAIRES) and Cdc2-Tyrosine15 phospho-specific antibodies in the case of wt extracts and anti-Cdc13 and Cdc2-Tyrosine15 phospho-specific antibodies for *cdc13-cdc2* samples.  $\alpha$ -Tubulin was used in both cases as loading control.

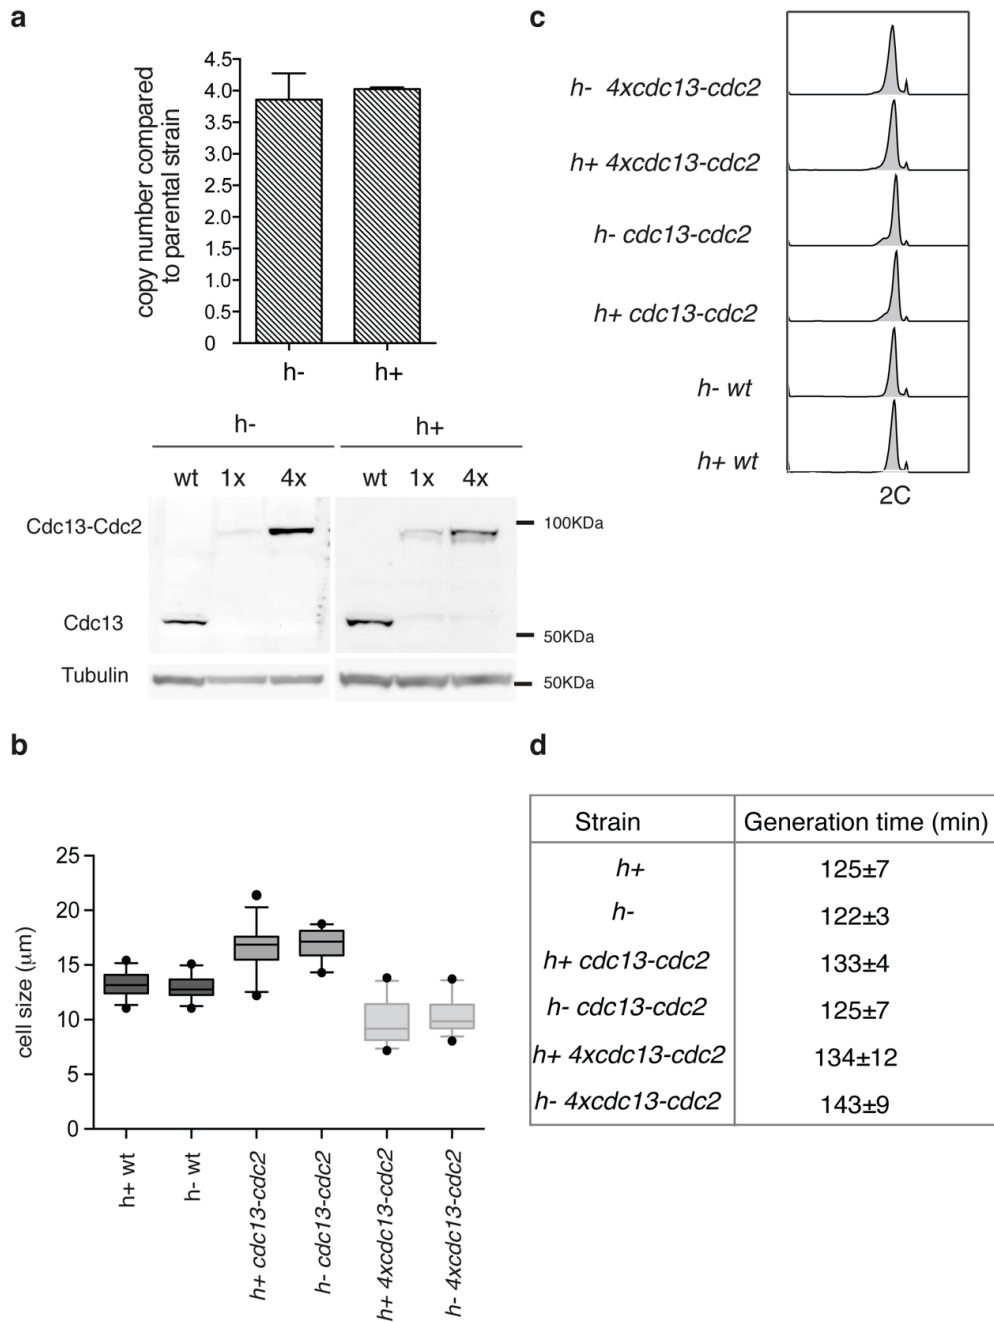

**Supplementary Figure 4. Characterization of the mitotic phenotype of *cdc13-cdc2* over-expression.** **a.** qPCR quantification of *cdc13-cdc2* copy number in *h+* (Pi46) and *h-* (Pi43) *cdc13-cdc2* over-expressing strains, normalized using the qPCR values of *h+* and *h- cdc13-cdc2* parental strains. Protein levels were analysed by Western blot in the same strains using anti-Cdc13 (SP4) and anti-tubulin (TAT1) antibodies, and including *h-* and *h+* wild type strains as controls. **b.** Size at division, (n=80 cells per strain, boxes represent 25–

75% of the data and the central lines indicate the median. Whiskers show 5–95% of the data. Dots represent the outer 10%). **c.** FACS profiles. **d.** generation times (mean of three experiments  $\pm$  standard deviation) of *h+* (PN4) and *h-* (PN1) wt, *cdc13-cdc2*  $\Delta 2$   $\Delta 13$   $\Delta CCP$  (*cdc13-cdc2*, *h+* DC235 and *h-* Pi4) and 4x *cdc13-cdc2*  $\Delta 2$   $\Delta 13$   $\Delta CCP$  (4x*cdc13-cdc2*, *h+* Pi46 and *h-* Pi43) strains grown at 32°C in YE4S.

**a**

|                                                                                   | wt   | <i>cdc13-cdc2</i><br>$\Delta 2\Delta 13\Delta CCP$ | <i>4xcdc13-cdc2</i> $\Delta 2\Delta 13$ |               |                |
|-----------------------------------------------------------------------------------|------|----------------------------------------------------|-----------------------------------------|---------------|----------------|
|                                                                                   |      |                                                    | $\Delta CCP$                            | $\Delta CCPR$ | $\Delta CCPRC$ |
| > 4 DAPI<br>stained bodies                                                        | 1.8  | 1.2                                                | 3.5                                     | 2.6           | 3.7            |
|  | 89.3 | 3.4                                                | 90.2                                    | 87            | 85.7           |
|  | 0.9  | 2.2                                                | -                                       | 2.6           | 0.5            |
|  | 4.5  | 3.4                                                | 3.3                                     | 1             | 1.2            |
|  | 1.3  | 6.7                                                | -                                       | 1.6           | 1.7            |
|  | 2.2  | 82                                                 | 3                                       | 4.1           | 5.6            |
|  | -    | -                                                  | -                                       | 1.1           | 0.5            |
|  | -    | 1.1                                                | -                                       | -             | 1.1            |

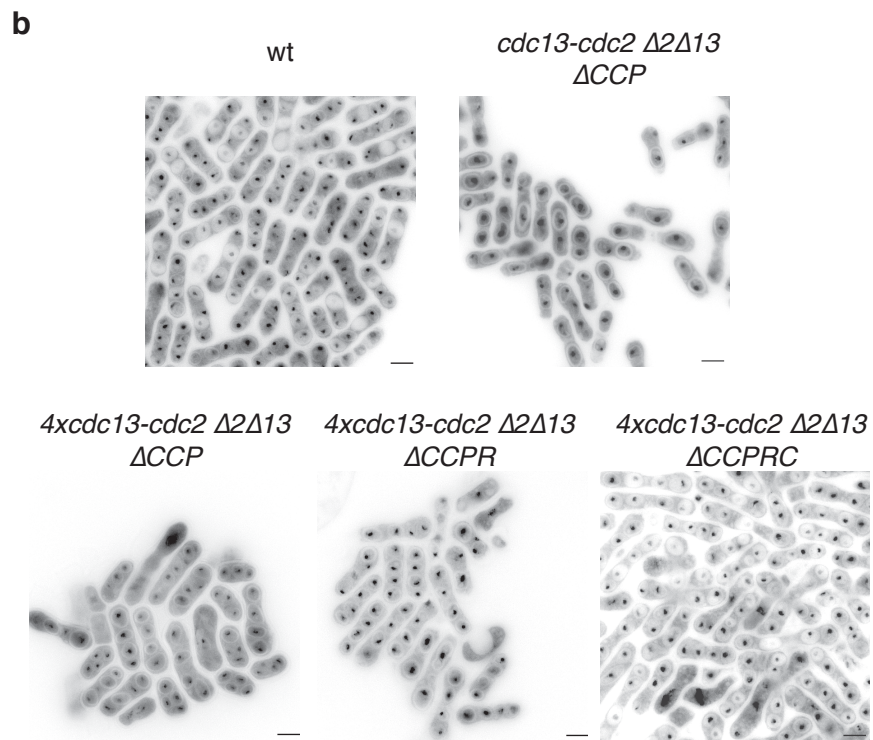

**Supplementary Figure 5. Frequency of aberrant nuclear divisions in Cdc13-Cdc2 fusion protein strains during meiosis.** Asci from *azygotic* synchronous meiosis were stained with DAPI and observed by microscopy. **a.** Phenotypic defects considered (based on <sup>20</sup>) and percentage of asci in each of them. At least 400 asci were scored for each strain. **b.** Representative pictures of each strain after 14 hours of meiotic induction. Scale bars, 5 $\mu$ m.

**Supplementary Table 1. Strains used in this study**

| <b>Name</b> | <b>Genotype</b>                                                                                                                                                                                                                 | <b>Source</b>  |
|-------------|---------------------------------------------------------------------------------------------------------------------------------------------------------------------------------------------------------------------------------|----------------|
| PN1         | <i>h<sup>-</sup> 972</i>                                                                                                                                                                                                        | Lab collection |
| PN4         | <i>h<sup>+</sup> 975</i>                                                                                                                                                                                                        | Lab collection |
| PN71        | <i>h<sup>-</sup> ade6-M210 leu1-32</i>                                                                                                                                                                                          | Lab collection |
| PN1394      | <i>h<sup>-</sup> Δcig1 ::ura4+ Δcig2 ::ura4+ ade6- leu1-32 ura4-D18</i>                                                                                                                                                         | Lab collection |
| PN1400      | <i>h<sup>-</sup> Δcig1 ::ura4+ Δcig2 ::ura4+ ura4-D18</i>                                                                                                                                                                       | Lab collection |
| PN1401      | <i>h<sup>+</sup> Δcig1 ::ura4+ Δcig2 ::ura4+ ura4-D18</i>                                                                                                                                                                       | Lab collection |
| PN1926      | <i>h<sup>+</sup> Δcig2 ::ura4+ ura4-D18</i>                                                                                                                                                                                     | Lab collection |
| PN1931      | <i>h<sup>-</sup> Δcig2 ::ura4+ leu1-32 ura4-D18</i>                                                                                                                                                                             | Lab collection |
| PN1942      | <i>h<sup>-</sup> Δcig2 ::ura4+ ura4-D18</i>                                                                                                                                                                                     | Lab collection |
| DC177       | <i>h<sup>-</sup> leu1 ::Pcdc13::cdc13-L-cdc2::cdc13 3'UTR::ura4+ Δcdc2 ::kanMX6 Δcdc13::natMX6 ura4-D18</i>                                                                                                                     | [4]            |
| DC210       | <i>h<sup>+</sup> leu1 ::Pcdc13::cdc13ts-L-cdc2as::cdc13 3'UTR::ura4+ Δcdc2 ::kanMX6 Δcdc13::natMX6 ura4-D18</i>                                                                                                                 | [4]            |
| DC235       | <i>h<sup>+</sup> leu1 ::Pcdc13::cdc13-L-cdc2::cdc13 3'UTR::ura4+ Δcdc2 ::kanMX6 Δcdc13::natMX6 Δcig1 ::ura4+ Δcig2 ::ura4+ Δpucl ::ura4+ ura4-D18</i>                                                                           | [4]            |
| Pi1         | <i>h<sup>-</sup> Δcig1::ura4 Δcig2::ura4 Δpucl::ura4 ura4-D18</i>                                                                                                                                                               | This work      |
| Pi4         | <i>h<sup>-</sup> leu1 ::Pcdc13::cdc13-L-cdc2::cdc13 3'UTR::ura4+ Δcdc2 ::kanMX6 Δcdc13::natMX6 Δcig1 ::ura4+ Δcig2 ::ura4+ Δpucl ::ura4+ ura4-D18</i>                                                                           | This work      |
| Pi5         | <i>h<sup>+</sup> Δcig1::ura4 Δcig2::ura4 Δpucl::ura4 ura4-D18</i>                                                                                                                                                               | This work      |
| Pi43        | <i>h<sup>-</sup> leu1 ::Pcdc13::cdc13-L-cdc2::cdc13 3'UTR::ura4+ Δcdc2 ::kanMX6 Δcdc13::natMX6 Δcig1 ::ura4+ Δcig2 ::ura4+ Δpucl ::ura4 3x(ura4+::Pcdc13::cdc13-L-cdc2::cdc13 3'UTR::ura4+::Scleu2) ura4-D18</i>                | This work      |
| Pi46        | <i>h<sup>+</sup> leu1 ::Pcdc13::cdc13-L-cdc2::cdc13 3'UTR::ura4+ Δcdc2 ::kanMX6 Δcdc13::natMX6 Δcig1 ::ura4+ Δcig2 ::ura4+ Δpucl ::ura4 3x(ura4+::Pcdc13::cdc13-L-cdc2::cdc13 3'UTR::ura4+::Scleu2) ura4-D18</i>                | This work      |
| Pi130       | <i>h<sup>-</sup> leu1 ::Pcdc13::cdc13-L-cdc2::cdc13 3'UTR::ura4+ Δcdc2 ::kanMX6 Δcdc13::natMX6 Δcig1 ::ura4+ Δcig2 ::ura4+ Δpucl ::ura4 Δrem1::hphNT1 3x(ura4+:: Pcdc13::cdc13-L-cdc2::cdc13 3'UTR::ura4+::Scleu2) ura4-D18</i> | This work      |
| Pi132       | <i>h<sup>+</sup> leu1 ::Pcdc13::cdc13-L-cdc2::cdc13 3'UTR::ura4+ Δcdc2 ::kanMX6 Δcdc13::natMX6 Δcig1 ::ura4+ Δcig2 ::ura4+ Δpucl ::ura4 Δrem1::hphNT1 3x(ura4+:: Pcdc13::cdc13-L-cdc2::cdc13 3'UTR::ura4+::Scleu2) ura4-D18</i> | This work      |
| Pi155       | <i>h<sup>-</sup> leu1 ::Pcdc13::cdc13-L-cdc2::cdc13 3'UTR::ura4+ Δcdc2 ::kanMX6 Δcdc13::natMX6 Δcig1 ::ura4+ Δcig2 ::ura4+ Δpucl ::ura4 Δrem1::hphNT1 Δcrs1::hphNT1 3x(ura4+:: Pcdc13::cdc13-L-cdc2::cdc13</i>                  | This work      |



|       |                                                                                                                                                                                                                                                          |           |
|-------|----------------------------------------------------------------------------------------------------------------------------------------------------------------------------------------------------------------------------------------------------------|-----------|
|       | <i>3'UTR::ura4+::Scleu2) ura4-D18</i>                                                                                                                                                                                                                    |           |
| Pi158 | <i>h<sup>+</sup> leu1 ::Pcdc13::cdc13-L-cdc2::cdc13 3'UTR::ura4+ Δcdc2 ::kanMX6<br/>Δcdc13::natMX6 Δcig1 ::ura4+ Δcig2 ::ura4+ Δpucl::ura4 Δrem1::hphNT1<br/>Δcrs1::hphNT1 3x(ura4+:: Pcdc13::cdc13-L-cdc2::cdc13<br/>3'UTR::ura4+::Scleu2) ura4-D18</i> | This work |
| 163   | <i>h+ Δrem1::hphNT1</i>                                                                                                                                                                                                                                  | This work |
| 166   | <i>h- Δcrs1::hphNT1</i>                                                                                                                                                                                                                                  | This work |
| Pi175 | <i>h<sup>-</sup> Δrem1::hphNT1 Δcrs1::hphNT1</i>                                                                                                                                                                                                         | This work |
| Pi176 | <i>h<sup>+</sup> Δrem1::hphNT1 Δcrs1::hphNT1</i>                                                                                                                                                                                                         | This work |
| Pi211 | <i>h<sup>+</sup> Δcig1::ur4 Δcig2::ura4 Δpucl::ura4 Δrem1::natNT2 Δcrs1::hphNT1 ura4-<br/>D18</i>                                                                                                                                                        | This work |
| Pi230 | <i>h<sup>+</sup>/h<sup>-</sup> Δrem1::hphNT1/ Δrem1::hphNT1 Δcrs1::hphNT1/ Δcrs1::hphNT1 cut11-<br/>GFP::kanmx6/ cut11-mCherry::natmx6</i>                                                                                                               | This work |
| Pi234 | <i>h<sup>90</sup> hht1-CFP:his+ Pnda3-mCherry-atb2:aur1R Sid4-mCherry::Scleu2 leu1-32<br/>his3-D1 ura4-D18</i>                                                                                                                                           | This work |
| Pi236 | <i>h<sup>+</sup> Δcig1::ura4 Δcig2::ura4 Δpucl::ura4 Δrem1::natNT2 ura4-D18</i>                                                                                                                                                                          | This work |
| Pi237 | <i>h- Δcig1::ur4 Δcig2::ura4 Δpucl::ura4 Δcrs1::hphNT1</i>                                                                                                                                                                                               | This work |
| Pi240 | <i>h<sup>+</sup> Δcig1::ura4 Δcig2::ura4 Δpucl::ura4 Δrem1::natNT2 Δpat1::pat1as2::hph</i>                                                                                                                                                               | This work |
| Pi242 | <i>h<sup>-</sup> Δcig1::ur4 Δcig2::ura4 Δpucl::ura4 Δrem1::natNT2 Δcrs1::hphNT1 ura4-D18</i>                                                                                                                                                             | This work |
| Pi251 | <i>h<sup>-</sup> Δcig1::ur4 Δcig2::ura4 Δpucl::ura4 Δrem1::natNT2 ura4-D18</i>                                                                                                                                                                           | This work |
| Pi253 | <i>h<sup>+</sup> leu1 ::Pcdc13::cdc13-L-cdc2::cdc13 3'UTR::ura4+ Δcdc2 ::kanMX6<br/>Δcdc13 ::natMX6 Δcig1 ::ura4+ Δcig2 ::ura4+ Δpucl ::ura4+<br/>Δpat1::pat1as2::hph ura4-D18</i>                                                                       | This work |
| Pi259 | <i>h<sup>+</sup> Δcig1::ura4 Δcig2::ura4 Δpucl::ura4 Δpat1::pat1as2::hph ura4-D18</i>                                                                                                                                                                    | This work |
| Pi260 | <i>h<sup>+</sup> leu1 ::Pcdc13::cdc13-L-cdc2::cdc13 3'UTR::ura4+ Δcdc2 ::kanMX6<br/>Δcdc13 ::natMX6 Δcig1 ::ura4+ Δcig2 ::ura4+ Δpucl ::ura4 3x(ura4+::<br/>Pcdc13::cdc13-L-cdc2::cdc13 3'UTR::ura4+::Scleu2) Δpat1::pat1as2::hph<br/>ura4-D18</i>       | This work |
| Pi263 | <i>h<sup>+</sup> Δpat1::pat1as2::hph</i>                                                                                                                                                                                                                 | This work |
| Pi275 | <i>h<sup>90</sup> hht1-CFP:his+ Pnda3-mCherry-atb2:aur1R Sid4-mCherry::Scleu2<br/>Δrem1::natNT2 Δcrs1::natNT2 leu1-32 his3-D1 ura4-D18</i>                                                                                                               | This work |
| Pi278 | <i>h<sup>+</sup> Δcig1::ur4 Δcig2::ura4 Δpucl::ura4 Δrem1::natNT2 Δcrs1::hphNT1<br/>Δpat1::pat1as2::hph</i>                                                                                                                                              | This work |
| Pi279 | <i>h<sup>-</sup> leu1 ::Pcdc13::cdc13-L-cdc2::cdc13 3'UTR::ura4+ Δcdc2::kanMX6<br/>Δcdc13::natMX6 Δcig ::ura4+ Δcig2::ura4+ Δpucl::ura4 Δrem1::hphNT1</i>                                                                                                | This work |



|       |                                                                                                                                                                                                                                                                |           |
|-------|----------------------------------------------------------------------------------------------------------------------------------------------------------------------------------------------------------------------------------------------------------------|-----------|
|       | <i>3x(ura4+::Pcdc13::cdc13-L-cdc2::cdc13 3'UTR::ura4+::Scleu2)<br/>Δpat1::pat1as2::hph ura4-D18</i>                                                                                                                                                            |           |
| Pi283 | <i>h<sup>+</sup> Δrem1::hphNT1 Δcrs1::hphNT1 Δpat1::pat1as2::hph</i>                                                                                                                                                                                           | This work |
| Pi285 | <i>h<sup>+</sup> leu1::Pcdc13::cdc13-L-cdc2::cdc13 3'UTR::ura4+ Δcdc2::kanMX6<br/>Δcdc13::natMX6 Δcig1::ura4+ Δcig2::ura4+ Δpucl::ura4 Δrem1::hphNT1<br/>Δcrs1::hphNT1 3x(ura4+::Pcdc13::cdc13-L-cdc2::cdc13 3'UTR::ura4+::Scleu2)<br/>Δpat1::pat1as2::hph</i> | This work |
| Pi292 | <i>h<sup>+</sup> Δcig1::ur4 Δcig2::ura4 Δpucl::ura4 Δcrs1::hphNT1</i>                                                                                                                                                                                          | This work |
| Pi296 | <i>h<sup>+</sup> Δcig1::ur4 Δcig2::ura4 Δpucl::ura4 Δcrs1::hphNT1 Δpat1::pat1as2::hph</i>                                                                                                                                                                      | This work |
| Pi313 | <i>h<sup>+</sup> Δcdc13::ura4 intREP41-cdc13::Scleu2 Δpat1::pat1as2::hph</i>                                                                                                                                                                                   | This work |
| Pi327 | <i>h- Δcrs1::hphNT1 ade6M26</i>                                                                                                                                                                                                                                | This work |
| Pi328 | <i>h+ Δcrs1::hphNT1 leu1-32 ade6M210</i>                                                                                                                                                                                                                       | This work |
| Pi333 | <i>h+ ade6M26</i>                                                                                                                                                                                                                                              | This work |
| Pi334 | <i>h- Δcig1::ur4 Δcig2::ura4 Δpucl::ura4 leu1-32</i>                                                                                                                                                                                                           | This work |
| Pi335 | <i>h+ Δcig1::ur4 Δcig2::ura4 pat1as2::hph</i>                                                                                                                                                                                                                  | This work |
| Pi336 | <i>h+ Δcig2::ura4 pat1as2::hph</i>                                                                                                                                                                                                                             | This work |
| Pi337 | <i>h- Δrem1::hphNT1</i>                                                                                                                                                                                                                                        | This work |
| Pi339 | <i>h+ Δcrs1::hphNT1</i>                                                                                                                                                                                                                                        | This work |
| Pi340 | <i>h+ Δrem1::hphNT1 ade6M26</i>                                                                                                                                                                                                                                | This work |
| Pi344 | <i>h- Δrem1::hphNT1 ade6M210 leu1-32</i>                                                                                                                                                                                                                       | This work |
| Pi346 | <i>h- ade6M210 leu1-32 Δcrs1::hphNT1 Δrem1::hphNT1</i>                                                                                                                                                                                                         | This work |
| Pi348 | <i>h+ ade6M26 leu1+ Δcrs1::hphNT1 Δrem1::hphNT1</i>                                                                                                                                                                                                            | This work |

**Supplementary Table 2. List of primers used for quantitative PCR.**

| Primmer name    | Sequence             |
|-----------------|----------------------|
| <i>fw-cdc13</i> | ATCATTGCGGGTATGCTCTC |
| <i>rv-cdc13</i> | CTGAAGGGCACATCACCTC  |
| <i>fw-act1</i>  | CGTCGCTTTGGACTTTGAGC |
| <i>rv-act1</i>  | TACCAGGTCCGCTCTCATCA |
